1 *Arabidopsis thaliana* *egy2* mutants display altered expression level of  
2 genes encoding crucial photosystem II proteins

3 Running title: *Egy2* affects chloroplast gene expression

4

5 Małgorzata Adamiec\*<sup>1</sup>, Lucyna Misztal<sup>1</sup>, Ewa Kosicka<sup>2</sup>, Ewelina Paluch-Lubawa<sup>1</sup> and Robert  
6 Luciński<sup>1</sup>

7 <sup>1</sup> Adam Mickiewicz University, Faculty of Biology, Institute of Experimental Biology,  
8 Department of Plant Physiology, ul. Umultowska 89, 61-614 Poznań, Poland

9 <sup>2</sup> Adam Mickiewicz University, Faculty of Biology, Institute of Experimental Biology,  
10 Department of Cell Biology, ul. Umultowska 89, 61-614 Poznań, Poland

11

12 **Correspondence:**

13 Małgorzata Adamiec

14 msolin@amu.edu.pl

15

16 Total word count: 5328

17 Figures: 7

18

19 Abstract

20

21 EGY2 is a zinc – containing, intramembrane protease, located in the thylakoid membrane. It  
22 is consider to be involved in the regulated intramembrane proteolysis - a mechanism leading  
23 to activation of membrane-anchored transcription factors through proteolytic cleavage, which  
24 causes them to be released from the membrane. The physiological functions of EGY2 in  
25 chloroplasts remains poorly understood. To answer the question what is the significance of  
26 EGY2 in chloroplast functioning two T-DNA insertion lines devoid of EGY2 protein were  
27 obtained and the mutants phenotype and photosystem II parameters were analyzed.  
28 Chlorophyll fluorescence measurements revealed that the lack of EGY2 protease caused  
29 changes in non-photochemical quenching (NPQ) and minimum fluorescence yield ( $F_0$ ) as well  
30 as higher sensitivity of photosystem II (PSII) to photoinhibition. Further immunoblot analysis  
31 revealed significant changes in the accumulation levels of the three chloroplast-encoded PSII  
32 core apoproteins: PsbA (D1) and PsbD (D2) forming the PSII reaction centre and PsbC – a  
33 protein component of CP43, a part of inner PSII antennae. The accumulation level of nuclear-  
34 encoded proteins-Lhcb1-3 - a components of the major light-harvesting complex II (LHCII) as  
35 well as proteins forming minor peripheral antennae complexes, namely Lhcb4 (CP29), Lhcb5  
36 (CP26), and Lhcb6 (CP24) remain, however, unchanged. The lack of EGY2 led to a  
37 significant increase in the level of PsbA (D1) with simultaneous decrease in accumulation  
38 levels of PsbC (CP43) and PsbD (D2). To test the hypothesis that the observed changes in the  
39 abundance of chloroplast-encoded proteins are a consequence of changes in gene expression  
40 levels, real-time PCR was performed. The obtained results shown that *egy2* mutants display  
41 an increased expression of *PSBA* and reduction in the *PSBD* and *PSBC* genes. Simultaneously  
42 pTAC10, pTAC16 and FLN1 proteins were found to accumulate in thylakoid membranes of  
43 analyzed mutant lines. These proteins interact with core complex of plastid encoded RNA  
44 polymerase and may be involved in the regulation of chloroplast gene expression.

45

46 Key words: *Arabidopsis thaliana*, chloroplast proteases, EGY2, photosystem II, regulated  
47 intramembrane proteolysis

48

## 49 Introduction

50

51 Regulated intramembrane proteolysis (RIP) is a mechanism that regulates gene expression at  
52 the transcriptional level. This process involves the activation of membrane-anchored  
53 transcription regulators through proteolytic cleavage, which causes them to be released from  
54 the membrane. The proteases participating in this process perform proteolytic cleavage within  
55 the cell membrane and are referred to as intramembrane cleaving proteases (I-CLiPs)  
56 (Weihofen et al., 2002, Koonin et al., 2003, Kinch et al., 2006). Site-2 proteases (S2P), zinc-  
57 containing metalloproteases that are able to perform proteolytic cleavage within a membrane,  
58 belong to the CLiPs family (Kinch et al., 2006). Representatives of this unusual and relatively  
59 recently discovered family of proteases are present in all living organisms. However,  
60 knowledge concerning their substrates, mechanisms of action and physiological roles remains  
61 rather limited. To date, several substrates of human and bacterial representatives of the S2P  
62 family have been identified. The first S2P substrate to be identified was human sterol  
63 regulatory element binding protein (SREBP), a transcription factor that is involved in the  
64 regulation of sterol and fatty acid synthesis (Brown and Goldstein, 1997). Other substrates  
65 also, although involved in very diverse physiological processes like responses to the  
66 accumulation of unfolded proteins in the endoplasmic reticulum (Ye et al., 2000; Kondo et al.,  
67 2005; Zhang et al., 2006), extracytoplasmic stress responses (Schobel et al., 2004) or the  
68 regulation of cell division (Bramkamp et al., 2006) have been identified as transcription  
69 factors.

70 A very little is known about the physiological functions of S2P proteases in plants. Five genes  
71 encoding S2P homologues with potential proteolytic activity were identified in the  
72 *Arabidopsis thaliana* genome, and the activity of three of them was confirmed experimentally  
73 (Chen et al., 2005; Che et al., 2010; Chen et al., 2012). The localization of all of the proteases  
74 was confirmed experimentally. Four of them were found in chloroplasts and one in the Golgi  
75 membrane (for a review see Adamiec et al., 2017). The only known substrate of plant S2P  
76 proteases is bZIP17, which is cleaved by the S2P protease encoded by *At4g20310*. bZIP17  
77 was found to control the expression levels of the transcription factor AtHB7 and the protein  
78 phosphatases HAB1, HAB2, HAI1 and AHG3, which are negative regulators of abscisic acid  
79 signalling (Zhou et al., 2015) and participate in the response to salt stress (Liu et al., 2007). It  
80 was also suggested that the S2P protease encoded by *At4g20310* may be involved in  
81 processing the transcription factor bZIP28 (Gao et al., 2008). There is, however, no direct  
82 experimental evidence confirming this prediction. The ARASP protease has been  
83 demonstrated to be essential for plant development and chloroplast biogenesis; however,  
84 deeper insight into ARASP-mediated events is lacking (Bölter et al., 2006). ARASP is closely  
85 co-expressed with another S2P homologue, S2P2 (Aoki et al., 2016). There is, however, no  
86 other evidence indicating cooperation between these proteases, and the physiological role of  
87 S2P2 remains unknown. The EGY1 protease is another *A. thaliana* S2P that is involved in  
88 chloroplast development (Chen et al., 2012). Additionally, in *egy1 A. thaliana* mutants, a  
89 deficiency in ethylene-induced gravitropism was detected (Guo et al., 2008). However, in this  
90 case, the mechanisms leading to phenotypic effects were not described. It seems possible that  
91 at least some of chloroplast located S2P may be involved in regulation of chloroplast gene  
92 expression. In higher plants transcription of chloroplast genes is carried out by two distinct  
93 types of RNA polymerases: PEP (plastid – encoded RNA polymerase) and NEP (nuclear-  
94 encoded plastid RNA polymerase). NEP is monomeric, phage-type RNA polymerase  
95 represented in *Arabidopsis thaliana* and other eudicots chloroplasts by RPOTp and RPOTmp  
96 (Elis and Hartley, 1971; Chang et al., 1999; Lagen et al., 2002). PEP, in turn, is holoenzyme  
97 functionally similar to *E. coli* RNA polymerase. The core of the enzyme is composed of the  
98 sigma subunit and four additional subunits:  $\alpha$ ,  $\beta$ ,  $\beta'$  and  $\beta''$  (Hajdukiewicz et al., 1997). The

99 sigma subunit is responsible for promoter recognition and initiation of transcription. In  
100 *Arabidopsis thaliana* six genes encoding sigma factors SIG1-SIG6 are present (for a review  
101 see Lysenko, 2007, Lerbs-Mache, 2011). The PEP core complex interacts with many  
102 additional proteins, called PEP-associated proteins (PAPs), like DNA gyrase, DNA  
103 polymerase, three ribosomal proteins (L12-A, S3 and L29), phosphofructokinase-B type  
104 enzymes PFKB1 and PFKB2 or Fe-dependent superoxide dismutases (Fe-SODs). Recently  
105 additional PAPs, named plastid transcriptionally active chromosome proteins (pTAC) were  
106 identified. These proteins were proven to be located within chloroplast membranes (Hess and  
107 Borner, 1999). In *Arabidopsis thaliana* genome 18 membrane attached pTAC proteins were  
108 identified, however their function and mechanism of action are poorly investigated (Pfalz et  
109 al., 2006). The majority of chloroplast genes are transcribed mainly by PEP or both PEP and  
110 NEP (Allison et al., 1996; Hajdukiewicz et al., 1997)

111 The EGY2 protease is also present in chloroplast membranes, and its proteolytic activity was  
112 demonstrated experimentally (Chen et al., 2012). The EGY2 protease contains 556 amino acid  
113 (aa) residues, and the number of predicted transmembrane domains varies from 5 to 8  
114 (Schwacke et al., 2003). The zinc atom is probably coordinated by and located in the  
115 hydrophobic region formed by H<sup>324</sup>, H<sup>328</sup> and D<sup>460</sup>, and the conserved structural region of the  
116 protein extends from A<sup>375</sup> to G<sup>380</sup> (Lamesch et al., 2011). The substrates of EGY2 remain  
117 unknown, and the physiological function of the protease has been poorly investigated.  
118 Although *egy2* knockout mutants do not display a clearly visible phenotype, EGY2 was found  
119 to play a role in hypocotyl elongation in *A. thaliana* (Chen et al., 2012). The EGY2 protease  
120 was also demonstrated to be involved in fatty acid biosynthesis. In *egy2* mutant seedlings, a  
121 decrease in overall fatty acid content was observed as well as reduced accumulation of acyl  
122 carrier protein 1 and of CAC2 and BCCP1, two subunits of plastidic acetyl-coenzyme A  
123 carboxylase (ACCase) (Chen et al., 2012).

124 To gain deeper insight into the role of the EGY2 protease in chloroplasts, we analysed  
125 changes in the accumulation of apoproteins that are encoded in the nuclear and chloroplast  
126 genomes and that are crucial for PSII structure. In this study, we showed that lack of EGY2  
127 protease influences the levels of the chloroplast-encoded apoproteins PsbA (D1), PsbD (D2)  
128 and PsbC (CP43) within the PSII core centre and that EGY2-mediated regulation of these  
129 proteins occurs at the transcriptional level.

## 130 Material and methods

131

### 132 Plant material and growth conditions

133 Wild-type (WT) and mutant *Arabidopsis thaliana* (L.) Heynh (ecotype Columbia) plants were  
134 grown on sphagnum peat moss and wood pulp in 42-mm Jiffy peat pellets (AgroWit, Przylep,  
135 Poland) under long-day conditions (16 h of light and 8 h of darkness) at an irradiance of 110  
136  $\mu\text{mol m}^{-2} \text{s}^{-1}$ , a constant temperature of 22°C and a relative humidity of 70 %.

137 *A. thaliana* seeds with a T-DNA insertion in the *EGY2* gene (*At5g05740*) were obtained from  
138 NASC (Nottingham Arabidopsis Stock Centre, Nottingham, UK). Two mutant lines were  
139 analysed: SALK\_028514C, which was previously described by Chen et al. (2012) as *egy2-3*,  
140 and SALK\_093297C, which was not described earlier. We decided to maintain the  
141 nomenclature used by Chen et al. (2012) and therefore, we refer SALK\_028514C as *egy2-3*,  
142 and SALK\_093297C as *egy2-5*. Homozygosity of the T-DNA insertion within the analysed  
143 gene was confirmed by PCR.

144 For both lines, the following primers were used:

145 forward: 5'-GGAACCAGAAGGCAATGATGATG-3'

146 reverse: 5'-AACCAGCAGCAAACCATTTCAG-3'

147 T-DNA insertion (LB): 5'-CCCTATCTCGGGCTATTCTTTTG-3'.

148

149 All measurements and analysis were performed in three biological replicates, on plants in  
150 developmental phase 6.0 according to the BBCH scale (Boyes et al., 2001). Thirty plants from  
151 each variant (WT, *egy2-3* and *egy2-5*) were measured in each replicate.

152

153 Nucleic acid analysis

154 DNA was isolated using the Phire Plant Direct PCR Master Mix (Thermo Fisher Scientific,  
155 Waltham, MA, USA). Total RNA for real-time PCR analysis was isolated using the  
156 GeneMATRIX Universal RNA Purification Kit (EUR<sub>x</sub><sup>®</sup>, Poland). Reverse transcription was  
157 performed using the RevertAid H Minus First Strand cDNA Synthesis Kit (K1631, Thermo  
158 Fisher Scientific) with random hexamers as primers and 5 µg of total RNA from the WT and  
159 *egy2* mutant lines. Real-time PCR was performed using the Rotor-Gene 6000 real-time rotary  
160 analyser (Corbett, Life Science Technology, Australia) and Maxima<sup>™</sup> SYBR Green/ROX  
161 qPCR Master Mix (Thermo Fisher). One microliter of cDNA was used for the qPCR reaction,  
162 and two cycling conditions were applied:

163 A) for the *PSBA*, *PSBD* and *PSBC* genes: 94°C for 20 s, 55°C for 30 s and 70°C for 30 s  
164 (40 cycles)

165 B) for the *PSBI* gene: 94°C for 20 s, 55°C for 30 s and 65°C for 30 s (40 cycles).

166 All primers were tested for nonspecific amplification and primer-dimer formation by melting  
167 curve analysis. As the reference, a gene encoding chloroplast ribosomal protein L2 was used.  
168 For each sample, six biological repetitions were performed, each in two technical repetitions.  
169 The primers used were as follows:

170 *PSBA*

171 F: 5'-ATACAACGGCGGTCCTTATGAAC-3'

172 R: 5'-CAAGGACGCATACCCAGACGG-3'

173

174 *PSBI*

175 F: 5'-ATGCTTACTCTCAAACCTT-3'

176 R: 5'-TTATTCTTCACGTCCCGGAT-3'

177

178 *PSBD*

179 F: 5'-GGATGACTGGTTACGGAGGG-3'

180 R: 5'-GAACCAACCCCTAAAGCGA-3'

181 *PSBC*

182 F: 5'-GCTCCTTTAGGTTTCGTTAAATTCTG-3'

183 R: 5'-AGAACAAAATGAGAGGTAGATAACC-3'

184 Gene encoding ribosomal protein L2 (AtCg00830)

185 F: 5'-ATGGAGGTGGTGAAGGGAGGG-3'

186 R: 5'-TTTTTCCTTTTTCTAGTTCTTCTTCC-3'

187 The amplification efficiency and the expression levels were calculated using Miner  
188 (<http://ewindup.info/miner/>) (Zhao and Fernald, 2005).

189 Protein analysis

190 Antibodies

191 Anti-EGY2 specific polyclonal antibodies were produced in rabbits by Agrisera AB (Vannas,  
192 Sweden) using the highly purified N-terminal region (aa 51-225) of EGY2 from *Arabidopsis*.

193 Anti-Lhcb1-6, anti-PsbA, anti-PsbC and anti -PsbD antibodies were purchased from Agrisera  
194 AB (Vannas, Sweden).

195 Isolation of proteins and determination of protein concentration

196 Total protein was isolated from 100 mg of *A. thaliana* leaf tissue using Protein Extraction  
197 Buffer (PEB, Vannas, Agrisera). The concentration of the extracted protein was determined  
198 using the modified Lowry method with a Lowry DC kit (Bio-Rad, Hercules, CA, USA).

199 SDS-PAGE and immunoblotting

200 SDS-PAGE was performed according to Laemmli (Laemmli, 1970) using 12 % (w/v)  
201 polyacrylamide gels. After electrophoresis, the proteins were transferred to PVDF membranes  
202 (Bio-Rad USA) and incubated with primary antibodies against PsbA, PsbC, PsbD and Lhcb1-  
203 6 after blocking of the membranes with 4 % (w/v) BSA (BioShop, Burlington, Canada). After  
204 incubation with secondary antibodies (Agrisera, Vannas, Sweden), the relevant bands were  
205 visualized on X-ray film using an RTG Optimax X-ray Film Processor (Protec GmbH,  
206 Oberstenfeld, Germany) following a 5-minute incubation of the PVDF membrane with Clarity  
207 Western ECL Substrate (Bio-Rad, Hercules, CA, USA). Quantification of the immunostained  
208 bands was performed using GelixOne software (Biostep GmbH, Jahnsdorf, Germany). For  
209 each primary antibody used, the range of linear immunoresponse was checked (Fig. S1). Only  
210 blots that showed a linear relationship between the strength of the signal and the amount of  
211 protein used were analysed.

212

213 Isolation of chloroplasts and thylakoid membranes

214 Chloroplasts were isolated from 20 g of *A. thaliana* leaf tissue using the Sigma Chloroplast  
215 Isolation Kit (Sigma- Aldrich, St. Luis, MO, USA). Leaves were homogenized in an ice-cold  
216 homogenization buffer with addition of 1 % (v/v) Protease Inhibitor Cocktail (PIC; Sigma-  
217 Aldrich, St. Luis, MO, USA) to avoid proteolysis. The homogenate was filtered through Mesh  
218 100 filter and the filtrate was centrifuged at 200 g for 1 min to remove the unbroken cells. The  
219 supernatant was then centrifuged for 10 min. at 1500 g to sediment the chloroplasts, which  
220 were then resuspended in the homogenization buffer with 1 % (v/v) PIC. To obtain the intact  
221 chloroplasts the chloroplast suspension was centrifuged through 40 % (w/v) Percoll for 6 min  
222 at 1700 g. To prepare the thylakoid membranes, the pellet of intact chloroplasts was  
223 resuspended in the lysis buffer with addition of 1 % (v/v) PIC and centrifuged for 10 min at  
224 12250 g. The thylakoid membranes were collected as a green pellet and used for protein  
225 extraction.

226 Protein extraction from the thylakoids, 2D-electrophoresis and protein identification

227 The thylakoids were homogenized on ice with the EB buffer (Tris-HCl pH 7.5, 25 % (w/v)  
228 Sucrose, 5 % glycerol, 10 mM EDTA, 10 mM EGTA, 5 mM KCl, 1 mM DTT) with addition  
229 of 0.5 % (w/v) PVPP and 1 % (v/v) PIC to avoid proteolysis. The thylakoid suspension was  
230 then centrifuged for 3 min at 600 g and the supernatant was diluted 2-times with water to  
231 reach a 12% concentration of sucrose in the EB buffer and centrifuged for 60 min at 100 000  
232 g. The pellet was collected and resuspended in the Tris-HCl buffer (pH 7.5) containing 5 mM  
233 EDTA and EGTA and 1 % (v/v) PIC. The protein concentration was measured using Bradford  
234 method (Bradford, 1976). Proteins were solubilized in the presence of 2 % (w/v) Brij<sup>®</sup> 58  
235 (Sigma - Aldrich, St. Luis, MO, USA) for 1 h at 4<sup>0</sup>C and then precipitated with acetone with  
236 10 % (w/v) TCA and 0.07 % (v/v)  $\beta$ -mercaptoethanol overnight at -20<sup>0</sup>C. The precipitated  
237 proteins pelleted by centrifugation for 15 min at 20 000 g and then washed three times with  
238 pure acetone. The obtained protein pellet was resuspended in buffer containing 7 M urea, 3 M  
239 thiourea, 2 % (w/v) amidosulfo betaine-14 (ASB-14; Sigma - Aldrich, St. Luis, MO, USA)  
240 and 65 mM DTT for 2 h in room temperature with constant gentle shaking and applied for  
241 isoelectrofocusing.

242 Isoelectrofocusing was carried out using the gel strips forming an immobilized pH gradient  
243 from 3 to 10 (Bio-Rad, Hercules, CA, USA). Strips were rehydrated overnight at room  
244 temperature and the isoelectrofocusing was performed at 18<sup>0</sup>C in the Protean i12 IEF Cell  
245 (Bio-Rad, Singapore) for 90 min at 300 V, 90 min at 3500 V, 20000 Vhr at 5500 V. After  
246 IEF strips were equilibrated according to Kubala et al. (2015) and the separation of proteins  
247 according to their molecular mass was performed using denatured electrophoresis in the 12 %  
248 (w/v) acrylamide gels with addition of 6 M urea. After electrophoresis the gels were stained  
249 with Coomassie Brilliant Blue (CBB) G-250 and photographed with the use of  
250 ChemiDoc<sup>TM</sup>MP Imaging System (Bio-Rad, Hercules, CA, USA).

251 Spot detection and image analysis were performed with the PDQuest<sup>TM</sup>Advanced 2-D Gel  
252 Analysis Software (Bio-Rad, Hercules, CA, USA). Four images representing two independent  
253 biological replicates for each *A. thaliana* lines (WT, *egy2-3* and *egy2-5*) were used. The  
254 differentially accumulated proteins ( $P < 0.05$ ) between the WT and both mutant plant lines  
255 with a ratio at least 2.0 in absolute value of protein abundance were excised manually under  
256 sterile condition and analyzed by liquid chromatography coupled to the mass spectrometer in  
257 the Laboratory of Mass Spectrometry, Institute of Biochemistry and Biophysics, Polish  
258 Academy of Science (Warsaw, Poland) as previously described Kubala et al. (2015). The raw  
259 data were processed using the Mascot Distiller software (ver. 2.4.2.0, MatrixScience) and then  
260 the obtained protein masses and fragmentation spectra were matched TAIR (The Arabidopsis  
261 Information Resource) filter using the Mascot Daemon engine search. The search parameters  
262 were set as follows: trypsin enzyme specificity, peptide mass tolerance  $\pm 20$  ppm, fragment  
263 mass tolerance  $\pm 0.6$  Da, unrestricted protein mass, one missed semiTrypsin cleavage site  
264 allowed, fixed cystine alkylation by carbamidomethylation and methionine oxydation set as  
265 variable modification.

266 Only the peptides with the Mascot score exceeding the threshold value corresponding to <  
267 0.05 false positive rate were considered as positively identified.

268

## 269 Determination of chlorophyll and carotenoid concentrations

270 The chlorophyll and carotenoid concentrations were measured using a DMSO assay (Hiscox  
271 and Israelstam, 1979). The following equations were used to determine the concentrations  
272 ( $\mu\text{g/ml}$ ) of chlorophyll a (Chl *a*), chlorophyll b (Chl *b*) and total carotenoids (C *x+c*), defined  
273 as sum of xanthophylls (*x*) and carotenes (*c*) (Sumanta et al., 2014).

$$274 \text{ Chl } a = 12.47 A_{665} - 3.62 A_{649}$$

$$275 \text{ Chl } b = 25.06 A_{649} - 6.5 A_{665}$$

$$276 C_{x+c} = (1000 A_{470} - 1.29 \text{ Chl } a - 53.78 \text{ Chl } b)/220$$

## 277 Chlorophyll fluorescence measurements

278 Chlorophyll fluorescence measurements were conducted using FMS1 (Photon System  
279 Instruments, Brno, Czech Republic) run by Modfluor software. Before each measurement, the  
280 leaves were dark-adapted for 30 min. The measurements were performed according to the  
281 protocol described by Genty et al. (1989). The minimum fluorescence yield ( $F_0$ ) was  
282 established at the beginning of measurement. The maximum quantum efficiency of PSII  
283 photochemistry ( $F_v/F_m$ ) and quantum efficiency of open centres in the light ( $F_v'/F_m'$ ) was  
284 calculated according to Genty et al. (1989). The applied actinic light intensity was equal to the  
285 irradiance prior dark-adaptation:  $110 \mu\text{mol m}^{-2} \text{ s}^{-1}$ . The photochemical fluorescence  
286 quenching coefficients  $qP$ ,  $\Phi\text{PSII}$  as well as non-photochemical quenching parameter (NPQ)  
287 were calculated according to Maxwell and Johnson (2000). Thirty plants from each variant  
288 (WT, *egy2-3* and *egy2-5*) were measured in each replicate.

## 289 Rosette area measurements

290 The rosette area was determined from plant photographs using ImageJ 1.50i software  
291 (National Institutes of Health, Bethesda, MD) (<https://imagej.nih.gov/ij/>).

292

## 293 Statistical analysis

294 Differences in the measured parameters were analysed for statistical significance using one-  
295 way ANOVA. Means were regarded as significantly different at  $P < 0.05$ .

296

## 297 Results

298

### 299 EGY2 T-DNA insertion mutants

300 The function of the EGY2 protease was studied in two commercially available lines with T-  
301 DNA insertion mutations. The lines were obtained from the Nottingham Arabidopsis Stock  
302 Centre. Lines SALK\_028514C (*egy2-3*) and SALK\_093297C (*egy2-5*) were chosen for  
303 analysis. The line *egy2-3* was previously described by Chen et al. (2012) as the line with  
304 single T-DNA insertion located in the fifth exon, however, in our model, the T-DNA insertion  
305 is located in the fourth exon (Fig. 1A). The observed difference is related to the splicing form  
306 of the investigated gene. The RT-PCR product of gene described by Chen et al. (2012) was  
307 1584 bp (corresponding to 527 aa) in length; according to TAIR (Lamesch et al., 2011). This



308 corresponds to the second splicing form of the *EGY2* gene model. In our RT-PCR analysis,  
309 we obtained a 1671-bp long coding sequence (encoding 556 aa); the length of our product is  
310 consistent with that of the first splice variant. The *egy2-5* line was not previously described.  
311 Our analysis indicated the presence of two T-DNA insertions located in the fifth and sixth  
312 exons (Fig. 1A). To verify the number of T-DNA insertions in the *egy2-5* mutant, PCR was  
313 performed using different combinations of primers for both WT and *egy2-5*. As shown in Fig.  
314 1B, no product from the WT DNA was obtained if one of the primers used was a T-DNA  
315 (LB) primer. In contrast, the PCR product sizes obtained when the A-LB and B-LB primer  
316 pairs were 1200-bp and 400-bp, respectively, indicated the presence of two T-DNA insertions.  
317 The absence of the EGY2 protease from both the *egy2-3* and *egy2-5* lines was confirmed by  
318 immunoblot analysis (Fig. 1C).

### 319 Phenotype of *egy2* mutants

320 The phenotypic analysis revealed no differences between *egy2* mutants and WT plants in leaf  
321 or inflorescence emergence or in flower or seed production (data not shown). Both mutant  
322 lines, however, displayed significantly larger final rosette areas than those observed in WT  
323 plants (Fig. 2). A slight but statistically significant decrease in chlorophyll content was also  
324 observed (Tab. 1). This reduction was observed for both chl *a* and chl *b* and was accompanied  
325 by a statistically significant reduction in the chl *a/b* ratio. A statistically significant reduction  
326 in total carotenoid accumulation was also observed (Tab. 1). Chlorophyll fluorescence  
327 measurements revealed that the lack of EGY2 protease did not cause statistically significant  
328 differences in the  $F_v/F_m$  ratio, which describes the maximum quantum yield of PSII  
329 photochemistry, or in  $F_v'/F_m'$ , which indicates the maximum efficiency of PSII  
330 photochemistry in the light. The  $\Phi_{PSII}$  parameter, which determines the quantum efficiency  
331 of PSII electron transport in the light, and  $qP$ , which is the coefficient of photochemical  
332 quenching and is associated with the proportion of open PSII (Maxwell and Johnson, 2000;  
333 Murchie and Lawson, 2013), also remained unchanged (Tab. 1). The only observed changes  
334 were found in non-photochemical quenching (NPQ), which is thought to be linearly related to  
335 heat dissipation (Maxwell and Johnson, 2000), and minimum fluorescence yield ( $F_0$ ). Both  $F_0$   
336 and NPQ were significantly increased in the two mutant lines under normal light conditions  
337 ( $110 \mu\text{mol m}^{-2} \text{s}^{-1}$ ) compared to their values in WT plants (Tab. 1). To determine whether the  
338 lack of EGY2 protease in *egy2* mutants affect the plant's sensitivity to photoinhibition,  
339 changes in the maximum quantum yield of PSII ( $F_v/F_m$ ) were investigated under high light  
340 conditions according to our previous work (Luciński et al., 2011). The maximum quantum  
341 efficiency of PSII photochemistry ( $F_v/F_m$ ) was measured in plants exposed for 2 h to  
342 photoinhibitory irradiance ( $800 \mu\text{mol m}^{-2} \text{s}^{-1}$ ); the plants were then illuminated for another 2 h  
343 with comfort irradiance ( $110 \mu\text{mol m}^{-2} \text{s}^{-1}$ ) to examine the ability of PSII to recover. The  
344 initial value of  $F_v/F_m$  was similar in the mutant and WT plants. At the end of the  
345 photoinhibitory period,  $F_v/F_m$  was decreased in both WT and mutant plants. However, the  
346 decrease was significantly greater in the mutant lines, suggesting that the mutant plants are  
347 more sensitive to photoinhibition than the WT plants. After two hours of recovery period the  
348  $F_v/F_m$  value was similar in the WT and mutant plants and returned to the value of the initial  
349 values, suggesting full regeneration of PSII (Fig. 3).

350

### 351 Abundance of selected PSII apoproteins in *egy2-3* and *egy2-5* mutants

352 Immunoblot analysis of the selected PSII apoproteins revealed no significant changes in the  
353 accumulation levels of the nuclear-encoded apoproteins Lhcb1-Lhcb6 (Fig. 4). However,  
354 three of the four analysed chloroplast-encoded apoproteins display altered accumulation

355 levels in both mutant lines relative to their levels in WT plants. Altered accumulation levels  
356 were displayed by both apoproteins that form the PSII core centre, PsbA (D1) and PsbD (D2).  
357 However, the abundance of the PsbA apoprotein, which forms the reaction centre of PSII, was  
358 increased to approximately 150 % in both mutant lines, whereas a reduction in the  
359 accumulation level of the PsbD apoprotein to 67 % of the normal value was observed. A very  
360 similar decrease in abundance was observed for PsbC, which is an apoprotein associated with  
361 the CP43 complex, an inner PSII antennae. PsbC level decreased to 68 % in *egy2-3* and to 67  
362 % in *egy2-5*. The amount of PsbI apoprotein, which is crucial for the stability of PSII  
363 supercomplexes, was unchanged in the mutant lines (Fig. 4).

364 To determine whether the increased PsbA accumulation level may be partially a result of  
365 impaired degradation, changes in PsbA abundance under high light conditions in mutant lines  
366 and WT plants were investigated. Due to the higher initial level of PsbA in the *egy2* mutant  
367 lines, the protein was present at a significantly higher level (approximately 150 % of its  
368 abundance in WT plants) throughout the whole period of plants exposure to  $800 \mu\text{mol m}^{-2} \text{s}^{-1}$ ,  
369 however the percentage decrease in the protein abundance was similar in all analysed lines,  
370 both *egy2* mutants and WT (Fig. 5).

371

## 372 qPCR analysis

373 To test the hypothesis that the observed changes in the abundance of chloroplast-encoded  
374 proteins are a consequence of changes in gene expression levels, real-time PCR was  
375 performed. The results revealed that the observed aberrations in PSII protein abundance in  
376 *egy2* mutants correlate strongly with changes in the transcription levels of the genes encoding  
377 these proteins. Significant increases in *PSBA* transcription to 132 % and 150 % of the levels  
378 seen in WT plants were observed in the *egy2-3* and *egy2-5* mutant lines, respectively. The  
379 abundance of *PSBD* transcripts was reduced to 74 % of that in the WT in the *egy2-3* mutant  
380 line and to 77 % of that in the WT in the *egy2-5* line. A slightly greater reduction was  
381 observed in the accumulation of the *PSBC* transcript. In the *egy2-3* mutant line, the *PSBC*  
382 transcript level abundance was reduced to 54 % of that found in WT plants. In the *egy2-5*  
383 mutant line, the accumulation of *PSBC* transcripts corresponded to 67 % of the level found in  
384 WT plants. No statistically significant changes in the abundance of the *PSBI* transcript were  
385 observed (Fig. 6).

## 386 Identification of proteins potentially involved in EGY2 dependent RIP

387 The EGY2 is located in thylakoid membrane and belongs to a group of intramembrane  
388 proteases, which are considered to activate membrane anchored transcription factors through  
389 proteolytic cleavage which release them from the membrane. To indicate potential  
390 transcription factors that may participate in EGY2 – dependent regulation of expression we  
391 performed comparative proteome analysis of thylakoid membranes. Two-dimensional  
392 electrophoresis was applied and protein spots whose abundance was increased at least 2-fold  
393 in both mutant lines were identified (Fig. 7). Only protein spots, the abundance of which was  
394 increased in two separate experiments, were selected for further analysis by LC - MS/MS.  
395 Selected spots were cut from two separate gels representing different *egy2* lines. For each  
396 sample LC - MS/MS analysis was performed and only proteins identified in both replicates  
397 were taken for further consideration. In 10 selected spots 218 proteins were identified by LC -  
398 MS/MS method (Fig. 7). The proteins with high score were screened for presence of plastid  
399 transcriptionally active chromosome proteins (pTAC) or other proteins related to chloroplast  
400 transcriptional machinery. pTAC10, FLN1 and pTAC16 were identified in 6th, 7th and 8th  
401 protein spot, respectively (Tab. 2). These proteins are known to be associated with PEP-

402 mediated transcription of chloroplast genes (Arsova et al., 2010; Ingelsson and Vener, 2012;  
403 Chang et al., 2017).

404

405 Discussion

406 In the *egy2-3* mutant line, T-DNA insertion in the fourth exon and the homozygosity of its  
407 insertion were confirmed. In the *egy2-5* mutant line, the presence of two T-DNA insertions,  
408 one in the fifth and one in the sixth exon, was revealed; the homozygosity of that mutant line  
409 was also confirmed. In both mutant lines, the EGY2 protein was undetectable.

410 The analysis of rosette growth indicated that the final area of the rosette leaves is significantly  
411 larger in both *egy2* mutant lines than in WT plants. In both *egy2* mutant lines, slight but  
412 statistically significant decreases in chlorophyll and carotenoid content were also observed, as  
413 well as a reduction in the chlorophyll *a/b* ratio. This result is inconsistent with previous  
414 reports that *egy2* mutants do not exhibit changes in chlorophyll content (Chen et al., 2012).  
415 The diverse results may be associated with plant growth conditions and with the stage of plant  
416 development at which the measurements were performed. The chlorophyll measurements  
417 performed by Chen were conducted on “adult plants” grown under constant white light 100  
418  $\mu\text{mol m}^{-2} \text{s}^{-1}$  (Lu et al., 2002; Chen et al., 2012) while our analysis were carried out on plants  
419 with first flower open grown under long-day conditions (16 h of light and 8 h of darkness) at  
420 slightly higher irradiance of 110  $\mu\text{mol m}^{-2} \text{s}^{-1}$ .

421 The lack of EGY2 protease leads to a significant increase in PsbA accumulation and to  
422 significant reductions in the abundance of PsbC and PsbD proteins. Altered protein levels are  
423 in turn reflected in some parameters that are related to PSII functioning in both normal and  
424 high irradiance conditions. The PAM fluorescence measurements of chl *a* measured on plants  
425 growing in normal light conditions revealed increased non – photochemical quenching (NPQ)  
426 and minimum fluorescence yield ( $F_0$ ) in both of the *egy2* mutant lines. These two parameters  
427 are used to quantify non – photochemical quenching (Maxwell and Johnson, 2000). NPQ is a  
428 process in which excess of absorbed light energy is dissipated into heat. The process can be  
429 triggered directly by protonation of antenna components or indirectly by the xanthophyll  
430 cycle and involves three key elements: the LHCII antenna, violaxanthin de-epoxidase and the  
431 PsbS protein. The minor peripheral antenna CP26 (Lhcb5) and CP29 (Lhcb4) were also  
432 proven to be enriched in xanthophyll cycle carotenoids and displayed high level of quenching  
433 (Bassi and Caffarri, 2000). The monomer peripheral antennae are as well consider as the site  
434 for NPQ (Ahn et al., 2008; Avenson et al., 2009). The protein component of CP43 (PsbC),  
435 acts as an internal PSII energy antenna, transmitting the excitation energy of electrons from  
436 the external antennae to the PSII reaction centre. In addition, together with Lhcb5, PsbC plays  
437 an important role in maintaining the strong affinity between peripheral antenna and the PSII  
438 core and in docking LHCII to the PSII core at so-called S-sites of PSII-LHCII  
439 supercomplexes (Boekema et al., 1999; Caffarri et al., 2009). Decreased PsbC content in *egy2*  
440 mutant lines can lead to increased pool of free LHCII timers and the decrease in excitation  
441 energy transfer from the antennae via PsbC to the PSII reaction centre. The excess excitation  
442 energy within the peripheral antennas has to be dissipated thermally, and this is manifested in  
443 an increase in the NPQ parameter. The  $F_0$  parameter, in turn, is altered by D1 damage but not  
444 by the xanthophyll cycle (Murchie and Lawson, 2013). It is possible to interpret the increase  
445 in the  $F_0$  parameter as a reduction of the rate constant of energy trapping by PSII centres  
446 (Havaux, 1993), which could also result from a physical dissociation of LHCII from the PSII  
447 core. Such an effect was previously observed in several plant species following heat damage  
448 (Armond et al., 1980). In this light, the observed increase in  $F_0$  may also be due to the reduced  
449 PsbC content, which causes elevated dissociation of LHCII from the PSII core. To investigate  
450 how the changes in chlorophyll fluorescence and variations in PsbA/D and PsbC  
451 stoichiometry influence PSII activity under photoinhibitory conditions, changes in PsbA level

452 and the sensitivity of *egy2* mutants to photoinhibition were measured. The somewhat more  
453 marked decrease in  $F_v/F_m$  under photoinhibitory conditions was observed, which indicates a  
454 slightly higher sensitivity of *egy2* mutants to photoinhibition, is likely to result from the  
455 disturbed stoichiometry of PsbA/PsbD. However, the recovery of PSII efficiency after the  
456 termination of photoinhibitory conditions was shown to be faster in the *egy2* mutants than in  
457 WT plants. This phenomenon may be partly because of the higher initial PsbA level. The  
458 mutant plants consistently maintain a significantly larger PsbA pool than the WT plants. The  
459 observed changes in the PsbA content during exposure of plants to high irradiance indicate,  
460 however, that the lack of EGY2 does not visibly impairs the rate of degradation of PsbA and  
461 the increased PsbA abundance is rather a consequence of increased synthesis than impaired  
462 degradation. From a physiological point of view, an interesting fact is that the genes encoding  
463 the PSII reaction center proteins are counter-regulated. This situation was also observed in  
464 other experimental conditions like 7 days cold treatment (4°C), treatment with DMTU, which  
465 is H<sub>2</sub>O<sub>2</sub> scavenger or overexpression of ABA responsive ABF3 transcription factor (Hruz et  
466 al., 2008). The increase in *PSBA* gene expression with simultaneous decrease in *PSBD* and  
467 *PSBC* was observed also in double mutant in calmodulin binding transcription activator  
468 *camta1 camta 2*, drought treatment of double mutant in SNF1-related protein kinases 2 *srk2cf*  
469 or triple mutant in cytokinin receptor *ahk2/ahk3/ahk4* and several other experimental  
470 conditions. (Hruz et al., 2008). Within the chloroplast genome, *PSBD* and *PSBC* genes are  
471 located in a single operon, whereas the *PSBA* gene is located on a separate one, however, both  
472 of them are classified as class I operons, transcribed by plastid-encoded plastid RNA  
473 polymerase (PEP; Hajdukiewicz et al., 1997). The promoter specificity of PEP is achieved by  
474 the sigma factors. In *Arabidopsis thaliana* six sigma factors (SIG1-6) have been identified.  
475 The *PSBC/PSBD* promoter was found to be recognized only by SIG5 sigma factor while  
476 SIG1, SIG2 and SIG5 factors were able to bind to *PSBA* operon (Chi et al., 2015). The  
477 counter-regulation of *PSBA* and *PSBC/PSBD* operons can therefore be a consequence of  
478 recognition by different types of PEP-complexes, transcription fine tuning by diverse PEP-  
479 associated proteins (PAPs) or the resultant of both of these phenomena. In two – dimensional  
480 electrophoresis and LC - MS/MS analysis three PAPs accumulating in thylakoid membranes  
481 of *egy2* mutants were identified, namely FLN1, pTAC10 and pTAC16. The role of these  
482 proteins in regulation of chloroplast genes transcription is, however, poorly investigated.  
483 Nonetheless the FLN1 was found to interact with another PAPs – thioredoxin z (TRX z) in a  
484 thiol-dependent way, indicating on redox-dependent transcriptional gene regulation pathway  
485 (Arsova et al., 2010, Wimmelbacher and Börnke, 2014). pTAC10 was also found to interact  
486 with TRX z, however the mechanism of this interaction remains elusive (Chang et al., 2017).  
487 Moreover, pTAC10 was proven to play crucial role in the proper assembly of the PEP  
488 complex and chloroplast development (Chang et al., 2017). The role of pTAC16 in regulation  
489 of chloroplast gene expression remains unknown. The protein was found to associate with  
490 nucleoid regions but is not essential for its formation and composition (Ingelsson and Vener,  
491 2012). The above results suggest that FLN1, pTAC10 and pTAC16 may participate in EGY2  
492 – dependent regulated intramembrane proteolysis process.

493

494

495

496

497 Author Contribution

498 MA: Developing of the article concept, performing of experiments and data analysis, drafting  
499 the article,

500 LM: selection and basic analysis of the homozygous mutant lines

501 EK: participation in the Real-Time experiments

502 EPL: developing the method of isolation of the thylakoid membrane proteins for IEF  
503 separation.

504 RL: participation in the design and realization of experiments. Participation in the  
505 development of the concept of the work, participation in 2D experiments. Head of the group.

506

507

508 Founding:

509 This work was supported by the Polish National Science Center based on decision number  
510 DEC-2014/15/B/NZ3/00412.

511

512 Acknowledgements:

513 The equipment used for LC - MS/MS analysis was sponsored in part by the Centre for  
514 Preclinical Research and Technology (CePT), a project co-sponsored by European Regional  
515 Development Fund and Innovative Economy, The National Cohesion Strategy of Poland.

516 Ewelina Paluch-Lubawa is Adam Mickiewicz University Foundation scholar in 2017/2018  
517 academic year

518

519

520

521 References

522

523 Adamiec, M., Ciesielska, M., Zalaś, P., and Luciński, R. (2017). *Arabidopsis thaliana*  
524 intramembrane proteases. *Acta Physiol. Plant.* 39, 146. doi: 10.1007/s11738-017-2445-2

525 Ahn, T.K., Avenson, T.J., Ballottari, M., Cheng, Y.C., Niyogi, K.K., Bassi, R., *et al.* (2008)  
526 Architecture of a charge-transfer state regulating light harvesting in a plant antenna protein.  
527 *Science* 320, 794–797. doi: 10.1126/science.1154800

528 Allison, L. A., Simon, L. D., and Maliga, P. (1996). Deletion of *rpoB* reveals a second distinct  
529 transcription system in plastids of higher plants. *EMBO J.* 15, 2802–2809. doi:  
530 10.1002/j.1460-2075.1996.tb00640.x

531 Aoki, Y., Okamura, Y., Tadak, S., Kinoshita, K., and Obayashi, T. (2016). ATTED-II in  
532 2016, a plant coexpression database towards lineage-specific coexpression. *Plant Cell*  
533 *Physiol.* 57, 1–9. doi: 10.1093/pcp/pcv165

534 Armond, P.A., Bjorkman, O., and Staehelin, L.A. (1980). Dissociation of supramolecular  
535 complexes in chloroplast membranes., A manifestation of heat damage to the photosynthetic  
536 apparatus. *Biochim. Biophys. Acta* 601, 433-442. [https://doi.org/10.1016/0005-](https://doi.org/10.1016/0005-2736(80)90547-7)  
537 [2736\(80\)90547-7](https://doi.org/10.1016/0005-2736(80)90547-7)

538 Arsova, B., Hoja, U., Wimmelbacher, M., Greiner, E., Üstün, S., Melzer, M., *et al.* (2010).  
539 Plastidial thioredoxin z interacts with two fructokinase-like proteins in a thiol-dependent  
540 manner: evidence for an essential role in chloroplast development in *Arabidopsis* and  
541 *Nicotiana benthamiana*. *Plant Cell*, 22(5), 1498–1515. <http://doi.org/10.1105/tpc.109.071001>

542 Avenson, T.J., Ahn, T.K., Niyogi, K.K., Ballottari, M., Bassi, R., *et al.* (2009) Lutein can act  
543 as a switchable charge transfer quencher in the CP26 light-harvesting complex. *J Biol. Chem.*  
544 284, 2830–2835. doi: 10.1074/jbc.M807192200

545 Bassi, R., and Caffarri, S. (2000). Lhc proteins and the regulation of photosynthetic light  
546 harvesting function by xanthophylls. *Photosynth Res.* 64(2-3), 243-256. doi:  
547 10.1023/A:1006409506272

548 Bölter, B., Nada, A., Fulgosi, H., and Soll, J. (2006). A chloroplastic inner envelope  
549 membrane protease is essential for plant development. *FEBS Letters* 580, 789–794. doi:  
550 10.1016/j.febslet.2005.12.098

- 551 Boekema, E.J., van Roon, H., Calkoen, F., Bassi, R., and Dekker, J.P. (1999). Multiple types  
552 of association of photosystem II and its light-harvesting antenna in partially solubilized  
553 photosystem II membranes. *Biochemistry* 23, 2233–2239. doi: 10.1021/bi9827161
- 554 Boyes, D.C., Zayed, A.M., Ascenzi, R., McCaskill, A.J., Hoffman, N.E., Davis, K.R., et al.  
555 (2001). Growth stage-based phenotypic analysis of *Arabidopsis*, a model for high throughput  
556 functional genomics in plants. *Plant Cell* 13, 1499–1510. doi: 10.1105/TPC.010011
- 557 Bradford, M.M. (1976). A rapid and sensitive method for the quantification of microgram  
558 quantities of protein utilizing the principle of protein-dye binding. *Anal. Biochem.* 72, 248–  
559 254. doi: 10.1016/0003-2697(76)90527-3
- 560 Bramkamp, M., Weston, L., Daniel, R.A., and Errington, J. (2006). Regulated intramembrane  
561 proteolysis of FtsL protein and the control of cell division in *Bacillus subtilis*. *Mol. Microbiol.*  
562 62, 580–591. doi: 10.1111/j.1365-2958.2006.05402.x
- 563 Brown, M.S., and Goldstein, J.L. (1997). The SREBP pathway, regulation of cholesterol  
564 metabolism by proteolysis of a membrane-bound transcription factor. *Cell* 89, 331–340.  
565 doi:10.1016/S0092-8674(00)80213-5
- 566 Caffarri, S., Kouřil, R., Kerešič, S., Boekema, E.J., and Croce, R. (2009). Functional  
567 architecture of higher plant photosystem II supercomplexes. *EMBO J.* 28(19), 3052–3063. doi:  
568 10.1038/emboj.2009.232
- 569 Chang, C.C., Sheen, J., Bligny, M., Niwa, Y., Lerbs-Mache, S., Stern D.B. (1999). Functional  
570 analysis of two maize cDNAs encoding T7-like RNA polymerases. *Plant Cell* 11, 911–926.  
571 doi: <https://doi.org/10.1105/tpc.11.5.911>
- 572 Chang, S.H., Lee, S., Um, T.Y., Kim, J.K., Choi, Y.D., and Jang G. (2017). pTAC10, a Key  
573 Subunit of Plastid-Encoded RNA Polymerase, Promotes Chloroplast Development. *Plant*  
574 *Physiol.* 174 (1), 435–449. doi: 10.1104/pp.17.00248
- 575 Che, P., Bussell, J.D., Zhou, W., Estavillo, G.M., Pogson, B.J., and Smith, S.M. (2010).  
576 Signaling from the Endoplasmic Reticulum Activates Brassinosteroid Signaling and Promotes  
577 Acclimation to Stress in *Arabidopsis*. *Sci. Signal.* 3(171), ra69. doi:  
578 10.1126/scisignal.2001140
- 579 Chen, G., Law, K., Ho, P., Zhang, X., and Li, N. (2012). EGY2., a chloroplast membrane  
580 metalloprotease., plays a role in hypocotyl elongation in *Arabidopsis*. *Mol. Bio. Rep.* 39,  
581 2147–2155. doi: 10.1007/s11033-011-0962-4
- 582 Chen, G., Bi, Y.R., and Li, N. (2005). EGY1 encodes a membrane-associated and ATP-  
583 independent metalloprotease that is required for chloroplast development. *Plant J.* 41, 364–  
584 375. doi: 10.1111/j.1365-313X.2004.02308.x
- 585 Chi, W., He, B., Mao, J., Jijang, J., Zhang, L. (2015). Plastid sigma factors: Their individual  
586 functions and regulation in transcription. *Biochim. Biophys. Acta* 1847(9), 770–778.  
587 <https://doi.org/10.1016/j.bbabi.2015.01.001>
- 588 Ellis, R.J., Hartley, M.R. (1971). Sites of Synthesis of Chloroplast Proteins. *Nature* 233,  
589 193–196. doi: 10.1038/newbio233193a0
- 590 Gao, H., Brandizzi, F., Benning, C., and Larkin, R.M. (2008). A membrane-tethered  
591 transcription factor defines a branch of the heat stress response in *Arabidopsis thaliana*. *PNAS*  
592 *USA* 105(42), 16398–16403. doi: 10.1073/pnas.0808463105
- 593 Genty, B., Briantais, J.M., and Baker, N.R. (1989). The relationship between the quantum  
594 yield of photosynthetic electron transport and quenching of chlorophyll fluorescence.  
595 *Biochim. Biophys. Acta* 990, 87–92. doi: 10.1016/S0304-4165(89)80016-9
- 596 Guo, D., Gao, X., Li, H., Zhang, T., Chen, G., Huang, P. et al. (2008). EGY1 plays a role in  
597 regulation of endodermal plastid size and number that are involved in ethylene-dependent  
598 gravitropism of light-grown *Arabidopsis* hypocotyls. *Plant Mol. Biol.* 66, 345–360. doi:  
599 10.1007/s11103-007-9273-5

600 Hajdukiewicz, P.T., Allison, L.A., and Maliga, P. (1997). The two RNA polymerases encoded  
601 by the nuclear and the plastid compartments transcribe distinct groups of genes in tobacco  
602 plastids. *EMBO J.* 16, 4041–4048. doi: 10.1093/emboj/16.13.4041  
603 Havaux, M. (1993). Rapid photosynthetic adaptation to heat stress triggered in potato leaves  
604 by moderately elevated temperatures. *Plant Cell Environ.* 6(4), 461–467. doi: 10.1111/j.1365-  
605 3040.1993.tb00893.x  
606 Hess, W. R., and Borner, T. (1999). Organellar RNA polymerases of higher plants. *Int. Rev.*  
607 *Cytol.* 190, 1–59. doi: 10.1016/S0074-7696(08)62145-2  
608 Hiscox, J.D., and Israelstam, G.F. (1979). A method for the extraction of chlorophyll from  
609 leaf tissue without maceration. *Canadian J. Bot.* 57, 1332–1334. doi: 10.1139/b79-163  
610 Hruz, T., Laule, O., Szabo, G., Wessendorp, F., Bleuler, S., Oertle, L., *et al.* (2008)  
611 Genevestigator v3: a reference expression database for the meta-analysis of transcriptomes.  
612 *Adv. Bioinf.* 420747. doi: 10.1155/2008/420747  
613 Ingelsson B., and Vener A. V. (2012). Phosphoproteomics of Arabidopsis chloroplasts reveals  
614 involvement of the STN7 kinase in phosphorylation of nucleoid protein pTAC16. *FEBS Lett.*  
615 586, 1265–1271. doi: 10.1016/j.febslet.2012.03.061  
616 Kinch, L.N., Ginalski, K., and Grishin, N.V. (2006). Site-2 protease regulated intramembrane  
617 proteolysis, Sequence homologs suggest an ancient signaling cascade. *Protein Sci.* 15(1), 84-  
618 93. doi: 10.1110/ps.051766506  
619 Kondo, S., Murakami, T., Tatsumi, K., Ogata, M., Kanemoto, S., Otori, K., *et al.* (2005).  
620 OASIS., a CREB/ATF-family member., modulates UPR signalling in astrocytes. *Nat. Cell*  
621 *Biol.* 7, 186–194. doi: 10.1038/ncb1213  
622 Koonin, E.V., Makarova, K.S., Rogozin, I.B., Davidovic, L., Letellier, M.C., Pellegrini, L.  
623 (2003). The rhomboids: a nearly ubiquitous family of intramembrane serine proteases that  
624 probably evolved by multiple ancient horizontal gene transfers. *Genome Biol.* 4, R19.  
625 doi: 10.1186/gb-2003-4-3-r19  
626 Kubala, S., Wojtyla, L., Quinet, M., Lechowska, K., Lutts, S., and Garnczarska, M. (2015).  
627 Enhanced expression of the proline synthesis gene P5CSA in relation to seed osmopriming  
628 improvement of *Brassica napus* germination under salinity stress. *Plant Sci.* 183, 1-12. doi:  
629 org/10.1016/j.jplph.2015.04.009  
630 Laemmli, U.K. (1970). Cleavage of structural proteins during the assembly of the head of  
631 bacteriophage T4. *Nature* 227, 680–685. doi:10.1038/227680a0  
632 Legen, J., Kemp. S., Krause, K., Profanter, B., Herrmann, R.G., Maier, R.M. (2002).  
633 Comparative analysis of plastid transcription profiles of entire plastid chromosomes from  
634 tobacco attributed to wild-type and PEP-deficient transcription machineries. *Plant J.* 31, 171-  
635 188. doi: 10.1046/j.1365-313X.2002.01349.x  
636 Lamesch, P., Berardini, T.Z., Li, D., Swarbreck, D., Wilks, C., Sasidharan, R., *et al.* (2011).  
637 The *Arabidopsis* Information Resource (TAIR), improved gene annotation and new tools.  
638 *Nucleic Acids Res.* 40, D1202-D1210. doi: 10.1093/nar/gkr1090  
639 Lerbs-Mache, S. (2011). Function of plastid sigma factors in higher plants: regulation of gene  
640 expression or just preservation of constitutive transcription? *Plant Mol.Biol.* 76, 235–249. doi:  
641 10.1007/s11103-010-9714-4  
642 Liu, J.X., Srivastava, R., Che, P., and Howell, S.H. (2007). Salt stress responses in  
643 *Arabidopsis* utilize a signal transduction pathway related to endoplasmic reticulum stress  
644 signaling. *Plant J.* 51, 897–909. doi: 10.1111/j.1365-313X.2007.03195.x  
645 Lu, B.W., Yu, H.Y., Pei, L.K., Wong, M.Y., and Li, N. (2002) Prolonged exposure to ethylene  
646 stimulates the negative gravitropic responses of *Arabidopsis* inflorescence stems and  
647 hypocotyls. *Funct Plant Biol.* 29(8), 989-999. doi: 10.1071/PP01254  
648 Luciński, R., Misztal, L., Samardakiewicz, S., and Jackowski, G. (2011). The thylakoid  
649 protease Deg2 is involved in stress-related degradation of the photosystem II light-harvesting

- 650 protein Lhcb6 in *Arabidopsis thaliana*. *New Phytol.* 192(1), 74-86. doi: 10.1111/j.1469-  
651 8137.2011.03782.x
- 652 Lysenko, E.A. (2007). Plant sigma factors and their role in plastid transcription. *Plant Cell*  
653 *Rep* 26, 845–859. doi: 10.1007/s00299-007-0318-7
- 654 Maxwell, K., and Johnson, G.N. (2000). Chlorophyll fluorescence—a practical guide. *J.*  
655 *Exp.Bot.* 51(345), 659-668. doi: 10.1093/jexbot/51.345.659
- 656 Murchie, E.H., and Lawson T. (2013). Chlorophyll fluorescence analysis, a guide to good  
657 practice and understanding some new applications. *J. Exp.Bot.* 64(13), 3983-3998. doi:  
658 10.1093/jxb/ert208.
- 659 Pfalz, J., Liere, K., Kandlbinder, A., Dietz, K. J., and Oelmuller, R. (2006). pTAC2,-6, and -  
660 12 are components of the transcriptionally active plastid chromosome that are required for  
661 plastid gene expression. *Plant Cell* 18, 176–197. doi: 10.1105/tpc.105.036392
- 662 Schobel, S., Zellmeier, S., Schumann, W., and Wiegert, T. (2004). The *Bacillus subtilis*  
663 sigmaW anti-sigma factor RsiW is degraded by intramembrane proteolysis through YluC.  
664 *Mol. Microbiol.* 52, 1091–1105. doi: 10.1111/j.1365-2958.2004.04031.x
- 665 Schwacke, R., Schneider, A., Van Der Graaff, E., Fischer, K., Catoni, E., Desimone, M., et al.  
666 (2003). ARAMEMNON., a novel database for *Arabidopsis* integral membrane proteins. *Plant*  
667 *Physiol.* 131(1), 16-26. doi: 10.1104/pp.011577
- 668 Sumanta, N., Haque, C.I., Nishika, J. and Suprakash, R. (2014). Spectrophotometric analysis  
669 of chlorophylls and carotenoids from commonly grown fern species by using various  
670 extracting solvents. *Res.J. Chem. Sci.*4(9), 63-69. doi: 10.1055/s-0033-1340072
- 671 Weihofen, A., Binns, K., Lemberg, M.K., Ashman, K., Martoglio B. (2002). Identification of  
672 signal peptide paptidase, a presenilin-type aspartic protease, *Science* 296, 2215–2218. doi:  
673 10.1126/science.1070925
- 674 Wimmelbacher, M., and Börnke, F. (2014). Redox activity of thioredoxin z and fructokinase-  
675 like protein 1 is dispensable for autotrophic growth of *Arabidopsis thaliana*. *J. Exp. Bot.*  
676 65(9), 2405–2413. doi: 10.1093/jxb/eru122
- 677 Ye, J., Rawson, R.B., Komuro, R., Chen, X., Dave, U.P., Prywes, R., et al. (2000). ER stress  
678 induces cleavage of membrane-bound ATF6 by the same proteases that process SREBPs.  
679 *Mol. Cell* 6(6), 1355–1364. doi: 10.1016/S1097-2765(00)00133-7
- 680 Zhang, K.Z., Shen, X.H., Wu, J., Sakaki, K., Saunders, T., Rutkowski, D.T., et al. (2006).  
681 Endoplasmic reticulum stress activates cleavage of CREBH to induce a systemic  
682 inflammatory response. *Cell* 124(3), 587–599. doi: 10.1016/j.cell.2005.11.040
- 683 Zhao, S., and Fernald, R.D. (2005). Comprehensive algorithm for quantitative real-time  
684 polymerase chain reaction. *J.Comput. Biol.* 12(8), 1047-1064. doi: 0.1089/cmb.2005.12.1047
- 685 Zhou, S.F., Sun, L., Valdés, A.E., Engström, P., Song, Z.T., Lu S.J., et al. (2015). Membrane-  
686 associated transcription factor peptidase., site-2 protease., antagonizes ABA signaling in  
687 *Arabidopsis*. *New Phytol.*208(1), 188–197. doi: 10.1111/nph.13436

## 688 689 Figure Legends

690  
691 Figure 1. Identification of *egy2* mutants. (A) Schematic diagram of the *Arabidopsis thaliana*  
692 *EGY2* gene. The black boxes represent exons; introns are shown as black lines. The triangles  
693 show the locations of T-DNA insertions. The arrows mark the annealing sites of the primers  
694 used for PCR analysis. (B) Confirmation of the homozygosity of the *egy2-3* and *egy2-5*  
695 mutants. Amplification was performed using the A, B and LB primers as indicated in Fig. 1A.  
696 (C) Immunoblot analysis of the *EGY2* protease protein in the wild-type (WT) and *egy2-3* and  
697 *egy2-5* mutants. Samples of total protein (2, 5 and 10 µg) were resolved by SDS-PAGE,  
698 electrotransferred to PVDF membranes and immunostained with the anti-*EGY2* antibody.



699 Figure 2. The comparison of rosette area of wild-type (WT), *egy2-3* and *egy2-5* lines. The  
700 rosette area was determined from plant photographs using ImageJ 1.50i software (National  
701 Institutes of Health, Bethesda, MD). The values shown the means  $\pm$  SD determined by  
702 analysis of 90 plants representing three independent biological replicates.

703 Figure 3. Maximum quantum efficiency of photosystem II photochemistry (Fv/Fm) in wild-  
704 type (WT), *egy2-3* and *egy2-5* leaves. The WT and mutant plants (black bars) were exposed  
705 for 2 h to  $800 \mu\text{mol m}^{-2} \text{s}^{-1}$  (dark grey bars) followed by 2 h recovery at normal irradiance  
706 (pale grey bars). The values shown are the means  $\pm$  SD determined by analysis of the Fv/Fm  
707 values of leaves representing three biological replicates (30 plants each).

708 Figure 4. Immunoblot analysis of the levels of Lhcb1-6, PsbA, PsbC, PsbD and PsbI in wild-  
709 type (WT), *egy2-3* and *egy2-5* mutants. Total protein (2  $\mu\text{g}$ ) from each sample were subjected  
710 to immunoblotting analysis with specific primary antibodies. Quantification of the blots was  
711 performed using GelixOne software. The individual apoprotein content of the mutants was  
712 quantified as a percentage of the antibody signal strength in the WT (100%). “ $\pm$ ” indicates the  
713 SD calculated from the analysis of samples from the four biological replicates. The asterisks  
714 indicate statistically significant differences between the WT and individual mutants.

715 Figure 5. Immunoblot quantification of PsbA apoprotein in wild-type (WT), *egy2-3* and *egy2-5*  
716 mutant plants under high light conditions. Plants were exposed to  $800 \mu\text{mol m}^{-2} \text{s}^{-1}$  for 6, 12  
717 and 24 hours. Total protein (2 $\mu\text{g}$ ) were immunologically analysed using an anti-PsbA  
718 antibody. GelixOne software was used to quantify the PsbA content. “ $\pm$ ” indicates the SD  
719 determined in the analysis of samples obtained from three biological replicates, each of which  
720 was obtained by isolation of total protein from a minimum of 30 plants.

721 Figure 6. Relative expression levels of *PSBA*, *PSBC*, *PSBD* and *PSBI* in wild-type (WT) and  
722 *egy2* mutant (*egy2-3* and *egy2-5*) plants. Five micrograms of total RNA isolated from wild-  
723 type and *egy2* mutant plants were used for reverse transcription with random hexamers as  
724 primers, and 1  $\mu\text{l}$  of cDNA was used in the qPCR reaction. The chloroplast ribosomal protein  
725 L2 gene was used as a reference. The results shown represent the means and standard errors  
726 determined by the analysis of samples from six biological replicates.

727 Figure 7. Two-dimensional electrophoresis gels. Thylakoid membrane proteins (150 $\mu\text{g}$ )  
728 isolated from wild type (WT), *egy2-3* and *egy2-5* lines were separated using 2-D gel  
729 electrophoresis with IEF (pH 3-10) and detected with Coomassie Brilliant Blue staining.  
730 Samples of proteins were obtained from four biological replicates of each plant lines. Ten  
731 protein spots were chosen for identification. All selected spots showed at least 2-fold up-  
732 regulation in comparison to WT, in both *egy2-3* and *egy2-5* mutant lines.

733

|                                   | WT          | <i>egy2-3</i>              | <i>egy2-5</i>              |
|-----------------------------------|-------------|----------------------------|----------------------------|
| rosette size [mm]                 | 1686 ± 407  | 2394* ± 673                | 2253*± 424                 |
| chl a                             | 528 ± 86    | 418* ± 54                  | 451*± 71                   |
| chl b                             | 201 ± 37    | 164* ± 20                  | 176*± 26                   |
| chl a/chl b ratio                 | 2.6± 0.01   | 2.5*± 0.01                 | 2.5* ± 0.01                |
| carotenoids                       | 114 ± 18    | 95* ± 11                   | 101*± 14                   |
| F <sub>0</sub>                    | 138 ± 8     | 190* <sup>a</sup> ± 19     | 250* <sup>a</sup> ± 25     |
| F <sub>v</sub> /F <sub>m</sub>    | 0.844± 0.01 | 0.838 ± 0.01               | 0.842 ± 0.00               |
| F <sub>v</sub> '/F <sub>m</sub> ' | 0.755± 0.02 | 0.762 ± 0.02               | 0.754 ± 0.02               |
| NPQ                               | 0.212± 0.08 | 0.328* <sup>a</sup> ± 0.06 | 0.371* <sup>a</sup> ± 0.06 |
| qP                                | 0.892± 0.01 | 0.894 ± 0.03               | 0.883 ± 0.03               |
| ΦPSII                             | 0.673± 0.02 | 0.681 ± 0.04               | 0.665 ± 0.03               |

734 Table 1. Comparison of the rosette size, chloroplast pigment content of leaves and chlorophyll  
 735 fluorescence parameters in wild-type (WT) plants and *egy2* (*egy2-3* and *egy2-5*) mutants in  
 736 normal light conditions. “±” indicates the SD calculated from the analysis of three biological  
 737 replicates (20 plants each). \* - indicate statistically significant differences between the WT  
 738 and individual mutants, <sup>a</sup> - indicate statistically significant differences between *egy2-3* and  
 739 *egy2-5*.

| Locus     | protein name | spot number | MW (molecular weight) | pI (isoelectric point) | protein score |     | number of peptid maches |    | protein coverage (%) |    |
|-----------|--------------|-------------|-----------------------|------------------------|---------------|-----|-------------------------|----|----------------------|----|
|           |              |             |                       |                        | I             | II  | I                       | II | I                    | II |
| At3g48500 | PTAC10       | 6           | 79/ 79,2              | 5,0/4,9                | 185           | 352 | 6                       | 12 | 7,3                  | 17 |
| AT3G46780 | PTAC16       | 8           | 54/54,3               | 8,9/8,4                | 720           | 537 | 14                      | 10 | 26,5                 | 20 |
| AT3G54090 | FLN 1        | 7           | 54/54,8               | 5,8/5,4                | 166           | 334 | 4                       | 7  | 9,6                  | 18 |

740 Table. 2 Elements of chloroplast transcriptional machinery identified in protein spots with  
 741 increased accumulation level in *egy2* mutants. I, II- indicates separate LC-MS/MS analysis.

WT *egy2-3* *egy2-5*

Anti-Lhcb1

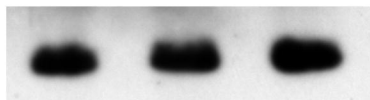

100% 102%±4 104%±4

Anti-Lhcb2

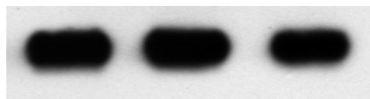

100% 102%±4 102%±4

Anti-Lhcb3

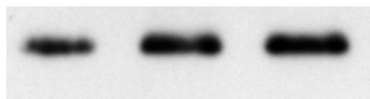

100% 104%±14 107%±9

Anti-PsbA

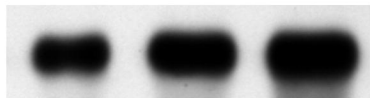

100% 152%\*±9 151%\*±7

Anti-PsbD

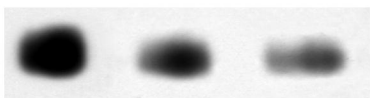

100% 67%\*±7 67%\*±5

WT *egy2-3* *egy2-5*

Anti-Lhcb4

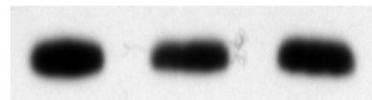

100% 92%±11 93%±10

Anti-Lhcb5

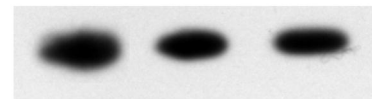

100% 94%±14 87%±6

Anti-Lhcb6

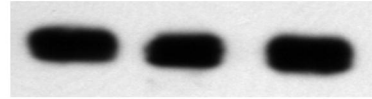

100% 95%±7 103±10

Anti-PsbC

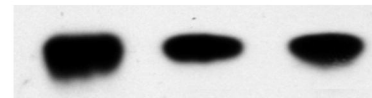

100% 68%\*±1 67%\*±3

Anti-Psbl

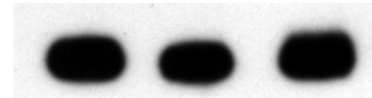

100% 99%±6 100%±6

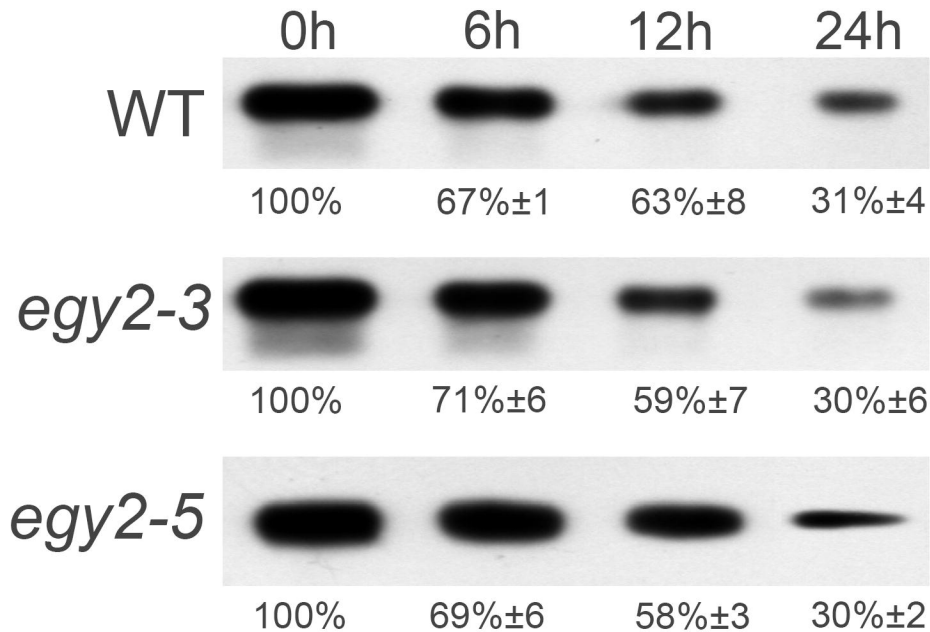

*PSBA*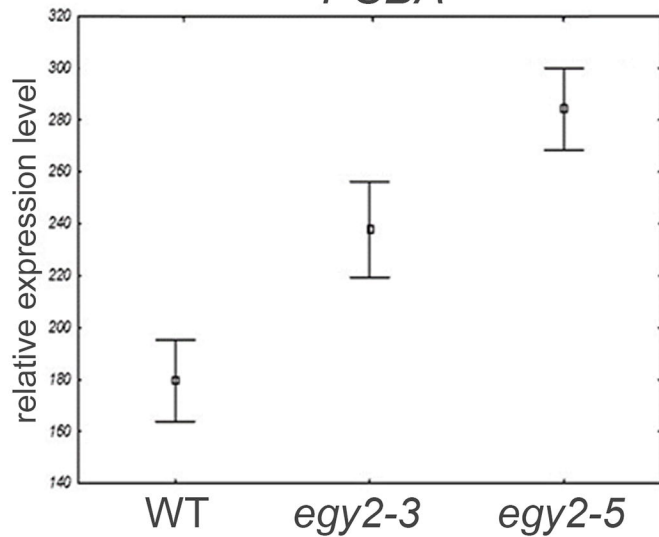*PSBC*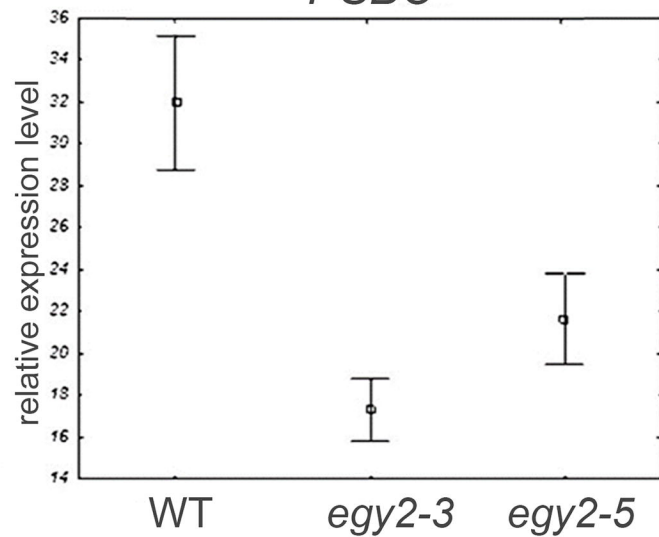*PSBD*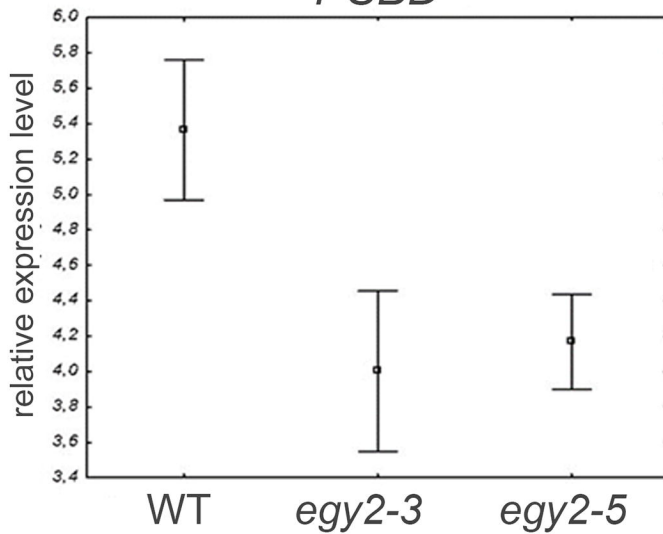*PSBI*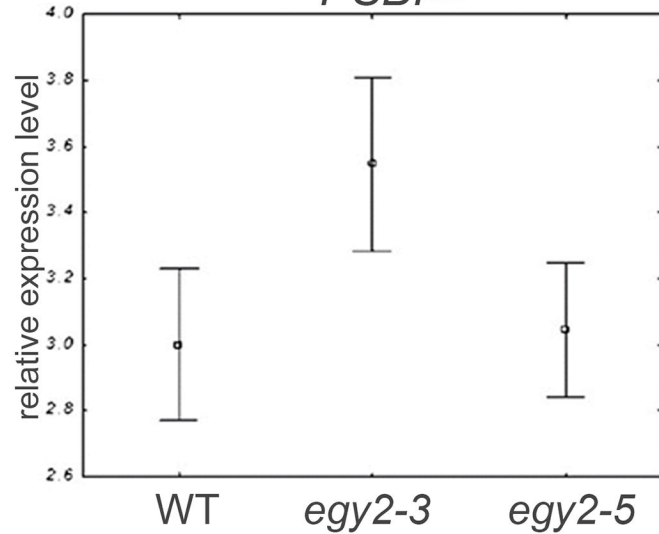

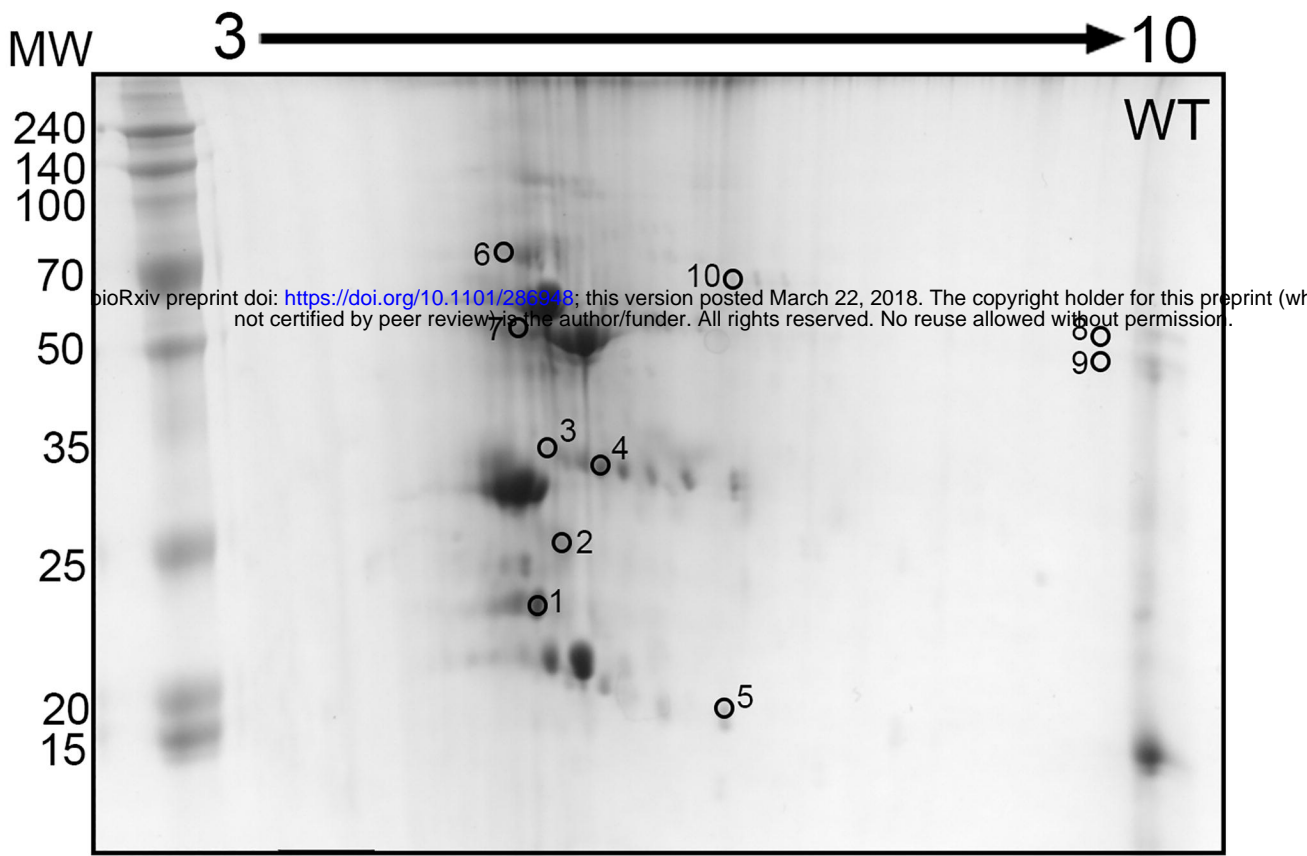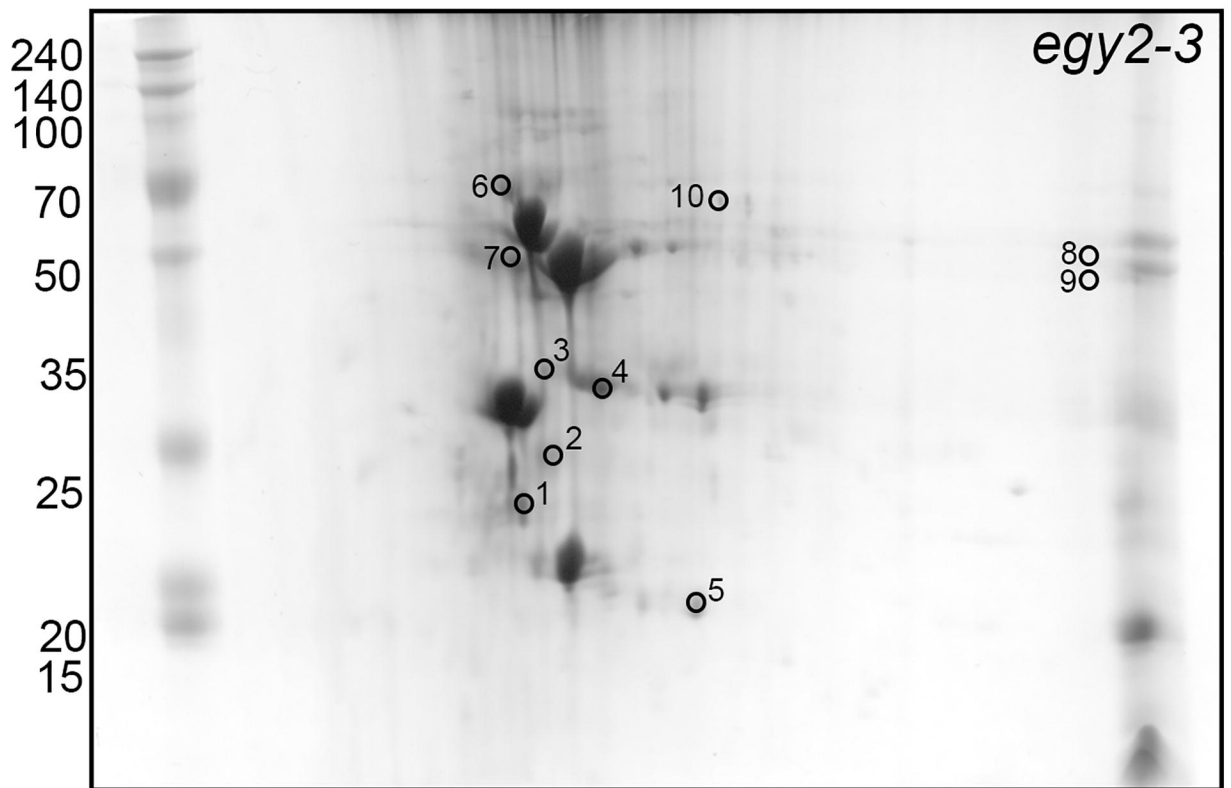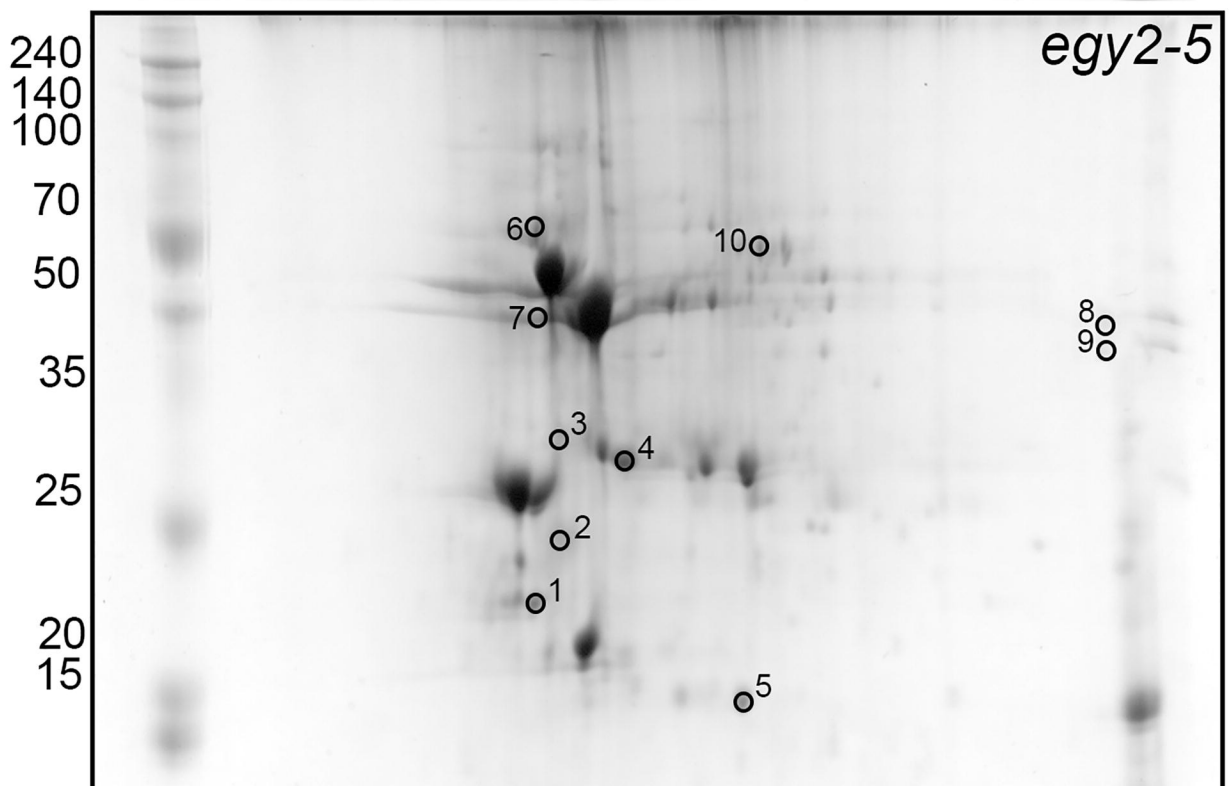

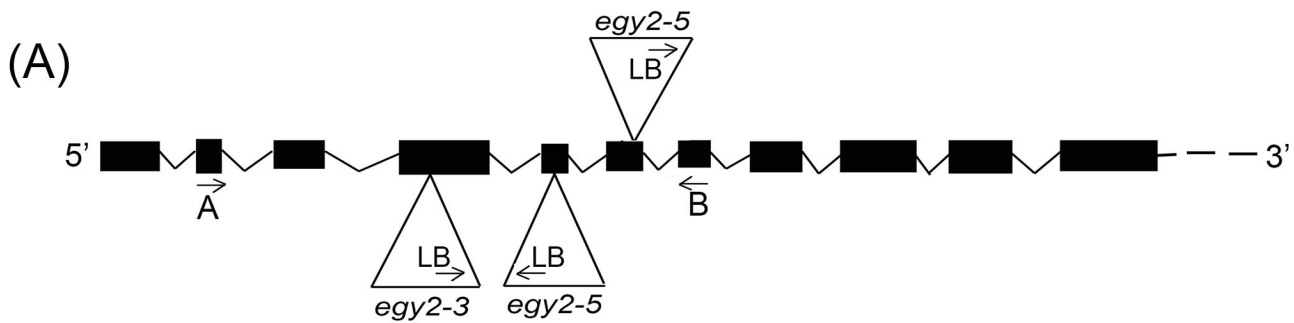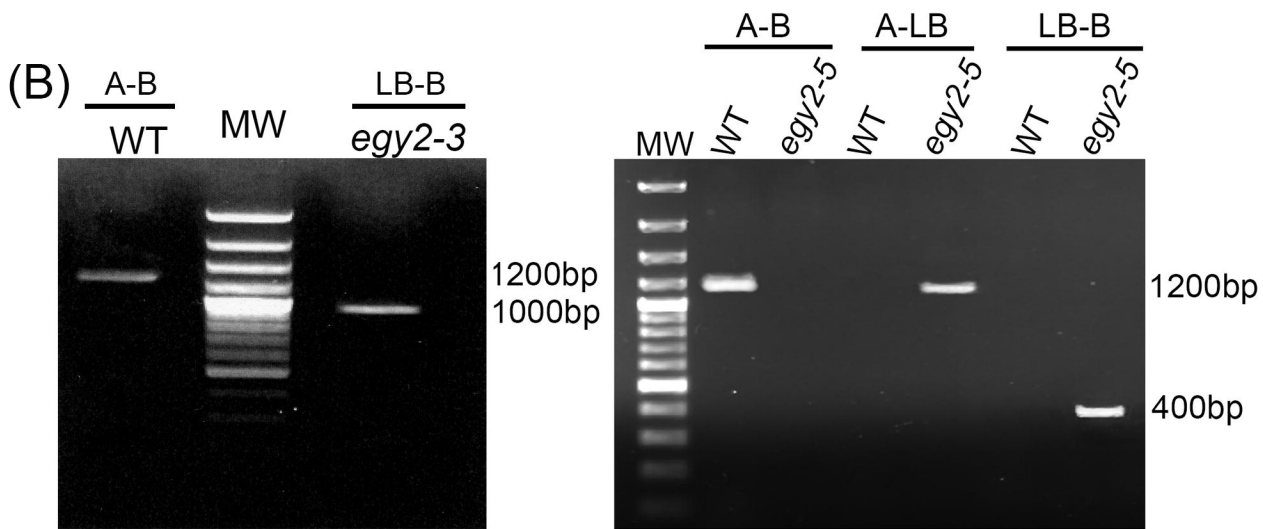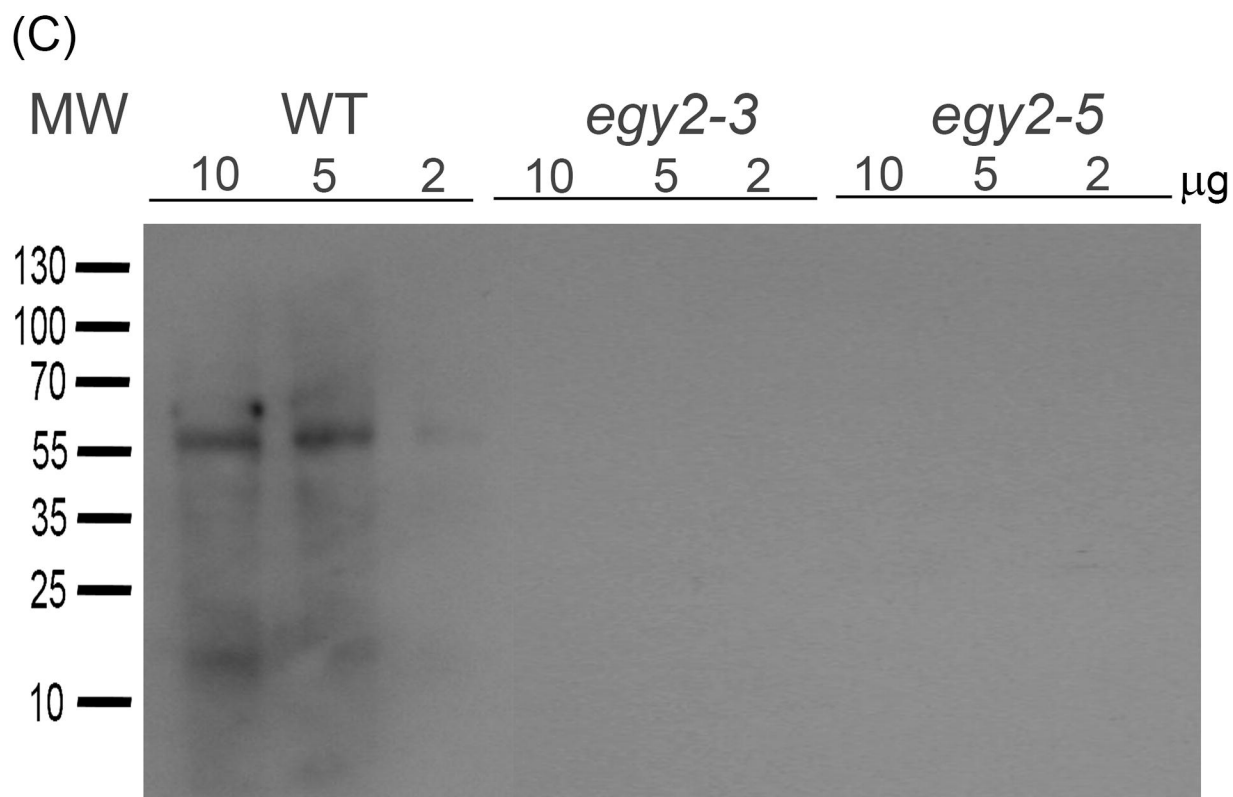

WT

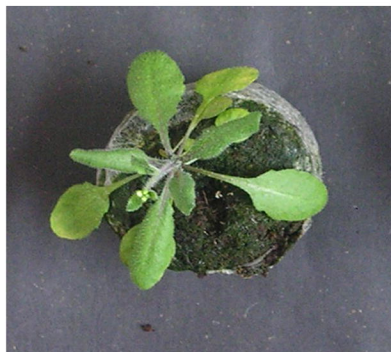

*egy2-3*

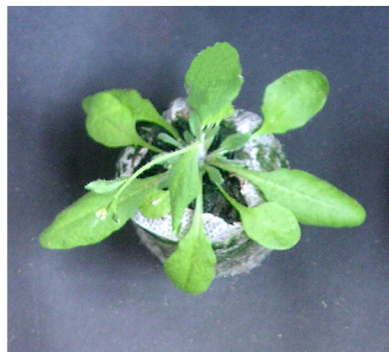

*egy2-5*

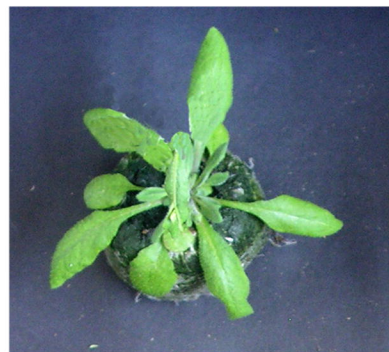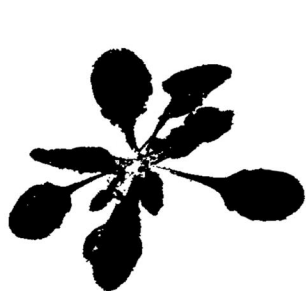

Area =  $1686 \pm 407$  [mm]

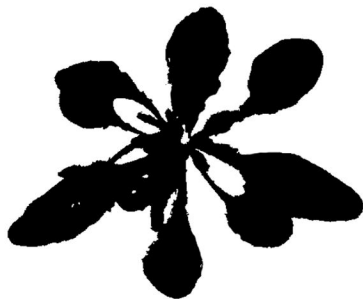

Area =  $2394^* \pm 673$  [mm]

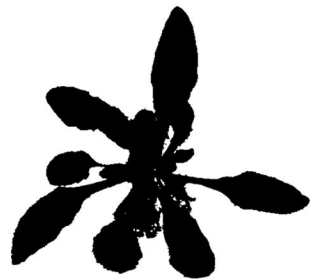

Area =  $2253^* \pm 424$  [mm]



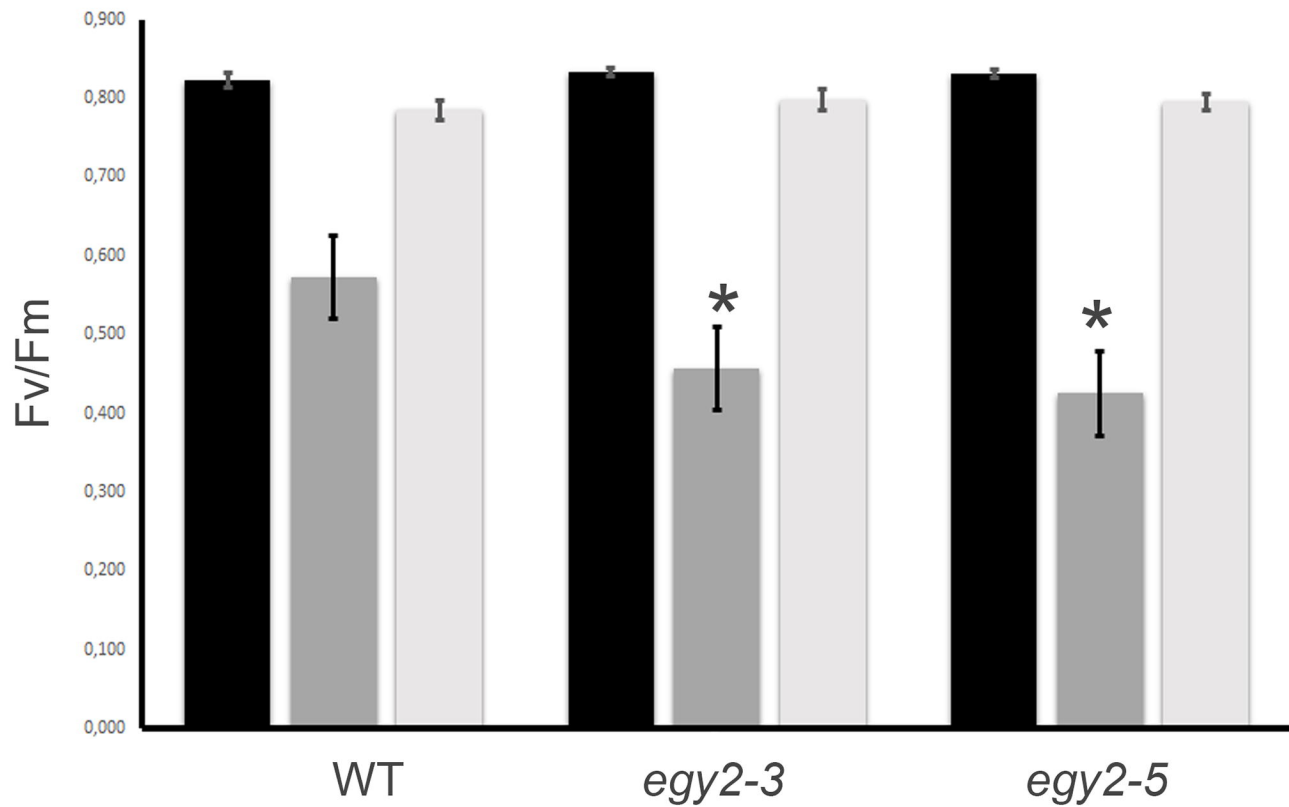

Source: https://www.biorxiv.org/content/10.1101/286948v1.full.pdf
